# Supplementary material
Source: HighWire-hosted journal article supplement (https://bmjopen.bmj.com/content/9/2/e023337)
Supplement: inline-supplementary-material-1 [file inline-supplementary-material-1.pdf]

## Supplementary materials

**Table 1:** Embase search strategy

|                                                                                           |
|-------------------------------------------------------------------------------------------|
| 1. "incidence".ab,kw,ti.                                                                  |
| 2. "prevalence".ab,kw,ti.                                                                 |
| 3. incidence/                                                                             |
| 4. prevalence/                                                                            |
| 5. 1 or 2 or 3 or 4                                                                       |
| 6. "acute coronary syndrome".ab,kw,ti.                                                    |
| 7. "myocardial infarction".ab,kw,ti.                                                      |
| 8. "NSTEMI".ab,kw,ti.                                                                     |
| 9. "STEMI".ab,kw,ti.                                                                      |
| 10. "st segment elevation myocardial infarction".ab,kw,ti.                                |
| 11. acute coronary syndrome/                                                              |
| 12. heart infarction/                                                                     |
| 13. unstable angina pectoris/                                                             |
| 14. 6 or 7 or 8 or 9 or 10 or 11 or 12 or 13                                              |
| 15. "bleed* ".ab,kw,ti.                                                                   |
| 16. "h?emorrhage".ab,kw,ti.                                                               |
| 17. exp bleeding/                                                                         |
| 18. 15 or 16 or 17                                                                        |
| 19. "post".ab,kw,ti.                                                                      |
| 20. "late onset".ab,kw,ti.                                                                |
| 21. "discharge* ".ab,kw,ti.                                                               |
| 22. "home".ab,kw,ti.                                                                      |
| 23. hospital discharge/                                                                   |
| 24. 19 or 20 or 21 or 22 or 23                                                            |
| 25. "mortality".ab,kw,ti.                                                                 |
| 26. "death".ab,kw,ti.                                                                     |
| 27. "MACE".ab,kw,ti.                                                                      |
| 28. "major adverse cardi* event* ".ab,kw,ti.                                              |
| 29. "reinfarction".ab,kw,ti.                                                              |
| 30. "readmi* ".ab,kw,ti.                                                                  |
| 31. hospital readmission/                                                                 |
| 32. heart reinfarction/                                                                   |
| 33. cardiovascular mortality/ or exp hospital mortality/ or mortality/ or mortality risk/ |
| 34. 25 or 26 or 27 or 28 or 29 or 30 or 31 or 32 or 33                                    |
| 35. 5 and 14 and 18 and 24                                                                |
| 36. 14 and 18 and 24 and 34                                                               |
| 37. 35 or 36                                                                              |
| 38. limit 37 to human                                                                     |

**Table 2:** Bleeding definitions

| <b>Criteria</b> | <b>Severity</b>                   | <b>Definition</b>                                                                                                                                                                                                                                                                                                                                                                                                                                                         |
|-----------------|-----------------------------------|---------------------------------------------------------------------------------------------------------------------------------------------------------------------------------------------------------------------------------------------------------------------------------------------------------------------------------------------------------------------------------------------------------------------------------------------------------------------------|
| <b>BARC</b>     | <b>Type 0</b>                     | No bleeding                                                                                                                                                                                                                                                                                                                                                                                                                                                               |
|                 | <b>Type 1</b>                     | Bleeding that is not actionable (Nuisance bleeds)                                                                                                                                                                                                                                                                                                                                                                                                                         |
|                 | <b>Type 2</b>                     | Actionable bleeding requiring hospitalisation, diagnostic studies and treatment by healthcare professional, but does not fit criteria for 3, 4 & 5.                                                                                                                                                                                                                                                                                                                       |
|                 | <b>Type 3</b>                     |                                                                                                                                                                                                                                                                                                                                                                                                                                                                           |
|                 | <b>A</b>                          | Overt bleeding + hemoglobin drop of 3 to <5 g/dl                                                                                                                                                                                                                                                                                                                                                                                                                          |
|                 |                                   | Any transfusion with overt bleeding                                                                                                                                                                                                                                                                                                                                                                                                                                       |
|                 | <b>B</b>                          | Overt bleeding + hemoglobin drop $\geq$ 5 g/dl                                                                                                                                                                                                                                                                                                                                                                                                                            |
|                 |                                   | Cardiac tamponade                                                                                                                                                                                                                                                                                                                                                                                                                                                         |
|                 |                                   | Bleeding requiring surgical intervention                                                                                                                                                                                                                                                                                                                                                                                                                                  |
|                 |                                   | Bleeding requiring intravenous vasoactive agents                                                                                                                                                                                                                                                                                                                                                                                                                          |
|                 | <b>C</b>                          | Intracranial bleed                                                                                                                                                                                                                                                                                                                                                                                                                                                        |
|                 |                                   | Intraocular bleed                                                                                                                                                                                                                                                                                                                                                                                                                                                         |
|                 | <b>Type 4</b>                     | CABG related bleeds                                                                                                                                                                                                                                                                                                                                                                                                                                                       |
|                 | <b>Type 5</b>                     |                                                                                                                                                                                                                                                                                                                                                                                                                                                                           |
|                 |                                   | <b>A</b>                                                                                                                                                                                                                                                                                                                                                                                                                                                                  |
|                 | <b>B</b>                          | Definite fatal bleeding: overt bleeding or autopsy or imaging confirmation                                                                                                                                                                                                                                                                                                                                                                                                |
| <b>TIMI</b>     | <b>Major</b>                      | Intracranial or a $\geq$ 5 g/dl decrease in hemoglobin or Bleeding resulting in death within 7 days                                                                                                                                                                                                                                                                                                                                                                       |
|                 | <b>Minor</b>                      | Overt blood loss or $\geq$ 3 to $\leq$ 5 g/dl decrease in hemoglobin or requiring intervention (medical practitioner-guided medical or surgical treatment to stop or treat bleeding including temporarily or permanently stopping or changing the dose of a medication or study drug or leading to or prolonging hospitalisation or prompting evaluation (leading to unscheduled visit to a healthcare professional and diagnostic testing, either laboratory or imaging) |
|                 | <b>Minimal</b>                    | Any overt bleeding that does not meet Major or Minor bleeding criteria above.                                                                                                                                                                                                                                                                                                                                                                                             |
| <b>GUSTO</b>    | <b>Severe or life threatening</b> | Intracerebral or resulting in substantial hemodynamic compromise requiring treatment                                                                                                                                                                                                                                                                                                                                                                                      |
|                 | <b>Moderate</b>                   | bleeding requiring blood transfusion or bleeding that does not cause hemodynamic compromise                                                                                                                                                                                                                                                                                                                                                                               |
|                 | <b>Mild</b>                       | bleeding that does not meet criteria for severe or moderate bleeding                                                                                                                                                                                                                                                                                                                                                                                                      |

|                           |                                                   |                                                                                                                                                                                                                                                                                                                                                                                                                                                                                               |
|---------------------------|---------------------------------------------------|-----------------------------------------------------------------------------------------------------------------------------------------------------------------------------------------------------------------------------------------------------------------------------------------------------------------------------------------------------------------------------------------------------------------------------------------------------------------------------------------------|
| <b>ACUITY/HORIZON</b>     | <b>Major</b>                                      | Intracranial or intraocular or access site bleeding requiring intervention or $\geq 5$ -cm diameter hematoma or hemoglobin drop of $\geq 4$ g/dl without an overt source or hemoglobin drop of $\geq 3$ g/dl with an overt source or reoperation for bleeding or requiring blood product transfusion                                                                                                                                                                                          |
| <b>CURE</b>               | <b>Major</b>                                      | Significantly disabling, intraocular bleeding leading to loss of vision or requiring transfusion of $\geq 2$ units of packed cells or bleeding that is life threatening (fatal or intracranial or results in decrease hemoglobin of at least 5 g/dl or leading to substantial hypotension requiring the use of inotropic agents or requiring surgical intervention or result in transfusion of $\geq 4$ units of blood                                                                        |
|                           | <b>Minor</b>                                      | bleed leading to discontinuation of study medication                                                                                                                                                                                                                                                                                                                                                                                                                                          |
| <b>ISTH</b>               | <b>Major</b>                                      | Fatal bleeding, and/or Symptomatic bleeding in a critical area or organ, such as intracranial, intraspinal, intraocular, retroperitoneal, intra-articular or pericardial, or intramuscular with compartment syndrome, and/or Bleeding causing a fall in hemoglobin level of 20 g/L (1.24 mmol/L) or more, or leading to transfusion of two or more units of whole blood or red cells                                                                                                          |
|                           | <b>Clinically non relevant non-major bleeding</b> | Any sign or symptom of haemorrhage (e.g., more bleeding than would be expected for a clinical circumstance, including bleeding found by imaging alone) that does not fit the criteria for major bleeding but does meet at least one of the following criteria: 1) requiring medical intervention by a healthcare professional or 2) leading to hospitalization or increased level of care or 3) prompting a face to face (i.e., not just a telephone or electronic communication) evaluation. |
| <b>OASIS 5</b>            | <b>Major</b>                                      | Clinically overt bleeding that is fatal, symptomatic intracranial, retroperitoneal, or intraocular, an HGB decrease of at least 3.0 g/dL (with each blood transfusion unit counting for 1.0 g/dL of HGB), or requiring transfusion of at least 2 units of red blood cells                                                                                                                                                                                                                     |
|                           | <b>Minor</b>                                      | Minor bleeding is considered to be any other clinically significant bleeding not meeting the definition for major bleeding and leading to interruption of study drug for at least 24 hours, surgical intervention or transfusion of one unit of blood (whole blood or PRBC)                                                                                                                                                                                                                   |
| <b>Fosbol et al 2012</b>  |                                                   | Re-hospitalisation for bleeding defined as gastrointestinal, intracranial, haemarthrosis, hemopericardium, haematuria, hemoptysis, epistaxis, haemorrhage not specified, acute post-hemorrhagic anaemia                                                                                                                                                                                                                                                                                       |
| <b>Tsai et al 2010</b>    |                                                   | Defined as hospitalisation with a primary diagnosis of gastrointestinal haemorrhage, or ulcer or GI bleed or perforation identified by surgery.                                                                                                                                                                                                                                                                                                                                               |
| <b>Carrero et al 2016</b> |                                                   | Defined as intracranial haemorrhage, gastrointestinal haemorrhage or anaemia.                                                                                                                                                                                                                                                                                                                                                                                                                 |

|                               |  |                                                                                                                                                                                                                                                                                                                                                                                   |
|-------------------------------|--|-----------------------------------------------------------------------------------------------------------------------------------------------------------------------------------------------------------------------------------------------------------------------------------------------------------------------------------------------------------------------------------|
| <b>Graipe et al 2015</b>      |  | Intracranial haemorrhage defined as subarachnoid haemorrhage, intracerebral haemorrhage and other intracranial haemorrhage using WHO ICD-10 classification.                                                                                                                                                                                                                       |
| <b>Sorensen et al 2009</b>    |  | Defined as an admission to a Danish hospital with a diagnosis of non-fatal bleeding or fatal bleeding including cerebral bleed, respiratory tract bleeds, gastrointestinal bleed, urinary tract bleed, and anaemia from acute or chronic bleeding.                                                                                                                                |
| <b>Cuschieri et al 2014</b>   |  | Gastrointestinal bleed defined as haematochezia, melena, hematemesis or coffee ground vomitus as documented by healthcare provider using ICD-9 codes                                                                                                                                                                                                                              |
| <b>Buresly et al 2005</b>     |  | Bleeding was defined as any hospital admission that occurred after the index AMI hospitalization with a principal or new secondary diagnosis of intracranial haemorrhage, gastrointestinal tract haemorrhage, aortic aneurysm dissection or rupture, intraocular haemorrhage, haematuria, hemoptysis, epistaxis, or haemorrhage not otherwise specified.                          |
| <b>Voss et al 2016</b>        |  | Defined as procedure related, gastrointestinal, respiratory, intracranial, intraocular, urogenital, and other, based on a list of ICD-10 codes.                                                                                                                                                                                                                                   |
| <b>Chamberlain et al 2016</b> |  | Defined as intracranial haemorrhage, gastrointestinal tract haemorrhage, haemarthrosis, hemopericardium, haematuria, hemoptysis, epistaxis, or haemorrhage not otherwise specified or acute post-hemorrhagic anaemia                                                                                                                                                              |
| <b>Atar et al 2006</b>        |  | Gastrointestinal bleeding was defined as blood loss from the GI tract of new onset, hematemesis, or melena with no other apparent source of acute blood loss. Severe or life-threatening GI bleeding was defined as bleeding associated with severe hemodynamic compromise. Major bleeding was defined as $\geq 15\%$ absolute reduction in haematocrit or need for a transfusion |
| <b>Bergen et al 1994</b>      |  | Major bleeding defined as intracranial or fatal bleed or bleeding that led to admission for hospital treatment.                                                                                                                                                                                                                                                                   |
| <b>Blin et al 2017</b>        |  | Defined as hospitalization with a primary diagnosis of bleeding using relevant ICD-10 codes.                                                                                                                                                                                                                                                                                      |
| <b>Brinkert et al 2017</b>    |  | Defined by ICD-10 codes as hospitalization with major bleeding.                                                                                                                                                                                                                                                                                                                   |

|                          |  |                                                                                                                                     |
|--------------------------|--|-------------------------------------------------------------------------------------------------------------------------------------|
| <b>Effron et al 2018</b> |  | Defined as rehospitalisation with bleeding or receipt of blood transfusion.                                                         |
| <b>Kazi et al 2015</b>   |  | Defined as major spontaneous bleeding                                                                                               |
| <b>Ko et al 2010</b>     |  | Defined as hospitalisation with bleeding post discharge                                                                             |
| <b>Erta et al 2018</b>   |  | Defined as physician-confirmed bleeding events.                                                                                     |
| <b>Garay et al 2016</b>  |  | Defined as bleeding that required hospitalization, transfusion of more than 1 blood pack, or suspension of antithrombotic treatment |
| <b>Garay et al 2018</b>  |  | Defined as intracranial bleeding or any other bleeding leading to hospitalization and/or red blood cell transfusion.                |

**Table 3:** Incidence of bleeding stratified by ACS presentation in observational studies and RCTs

| Study design          | Primary Author       | Length of Follow-up | Bleeding Criteria                  | No with bleed | Crude Incidence of Bleeding per 100 persons and 95% CI |
|-----------------------|----------------------|---------------------|------------------------------------|---------------|--------------------------------------------------------|
| <b>STEMI</b>          |                      |                     |                                    |               |                                                        |
| Observational Studies | Amin et al 2016      | 6 Months            | BARC 1-5                           | 1023          | 24.8 (23.5, 26.1) *                                    |
|                       | Amin et al 2013      | 12 months           | BARC 1                             | 628           | 39.8 (37.4, 42.2) *                                    |
|                       | Lattuca et al 2016   | 12 Months           | BARC 1-3                           | 132           | 35.8 (31.1, 40.8) *                                    |
|                       | Bacquelin et al 2015 | 12 months           | BARC 2-5                           | 79            | 7.85 (6.35, 9.68) *                                    |
|                       | Kassaian et al 2015  | 12 months           | GUSTO mild, moderate, severe.      | 6             | 1.43 (0.65, 3.07) *                                    |
|                       | Graipe et al 2015    | 12 months           | Intracranial bleed                 | 169           | 0.27 (0.23, 0.31) *                                    |
|                       | Caneiro et al 2018   | 455 days (Median)   | BARC 2 - 3                         | 195           | 12.0 (10.5, 13.7) *                                    |
|                       | Wong et al 2006      | 21 months           | CURE major/life threatening        | 8             | 6.9 (3.54, 13.0) *                                     |
|                       | Erta et al 2018      | 24 months           | Physician-confirmed bleeding event | 12            | 2.38 (1.37, 4.12) *                                    |
| RCTs                  | Han et al 2015       | 12 months           | BARC 1-5                           | 42            | 2.37 (1.76, 3.19) *                                    |
|                       | Mrdovic et al 2013   | 12 months           | TIMI major/minor                   | 25            | 1.29 (0.87, 1.89) *                                    |
|                       | Nikolsky et al 2015  | 3 years             | HORIZON major                      | 63            | 2.15 (1.68, 2.74) *                                    |
| <b>NSTEMI/UA</b>      |                      |                     |                                    |               |                                                        |
| Observational Studies | Cuisset et al 2009   | 1 month             | TIMI major/minor                   | 16            | 2.68 (1.66, 4.31) *                                    |
|                       | Amin et al 2016      | 6 Months            | BARC 1-5                           | 1044          | 24.2 (23.0, 25.5) *                                    |
|                       | Amin et al 2013      | 12 months           | BARC 1                             | 707           | 35.7 (33.6, 37.8) *                                    |
|                       | Palmerini et al 2014 | 12 months           | BARC (any)                         | 41            | 3.91 (2.89, 5.26) *                                    |
|                       | Kassaian et al 2015  | 12 months           | GUSTO mild, moderate, severe.      | 17            | 1.39 (0.87, 2.22) *                                    |
|                       | Graipe et al 2015    | 12 months           | Intracranial bleed                 | 410           | 0.34 (0.31, 0.37) *                                    |
|                       | Caneiro et al 2018   | 455 days (Median)   | BARC 2 - 3                         | 305           | 11.7 (10.5, 13.0) *                                    |
|                       | Wong et al 2006      | 21 months           | CURE major/life threatening        | 7             | 6.48 (3.17, 12.8) *                                    |

|      |                      |                   |                                    |     |                     |
|------|----------------------|-------------------|------------------------------------|-----|---------------------|
|      | Erta et al 2018      | 24 months         | Physician-confirmed bleeding event | 9   | 1.78 (0.94, 3.35) * |
| RCTs | Jolly et al 2009     | 8 months          | CURE major                         | 28  | 1.07 (0.74, 1.54) * |
|      | Savonitto et al 2012 | 12 months         | BARC 2, 3a & 3b                    | 3   | 0.96 (0.33, 2.78) * |
|      | Mahaffey et al 2013  | 502 days (Median) | TIMI major/minor                   | 236 | 2.12 (1.87, 2.41) * |

\* Incidence and associated 95% CI calculated from data within study, **CI**: Confidence Interval, **TIMI**: Thrombolysis In Myocardial Infarction, **BARC**: Bleeding Academic Research Consortium, **GUSTO**: Global Use of Strategies To open Occluded arteries, **CURE**: Clopidogrel in Unstable angina to prevent Recurrent Events, **HORIZON**: Harmonising Outcomes with Revascularisation and stents.

**Table 4:** Incidence of bleeding in observational studies stratified by discharge antithrombotic therapy and duration

| Primary Author       | Length of Follow-up | Bleeding definition                             | Discharge Antithrombotic combination   | Duration  | No with bleed | Crude Incidence of Bleeding per 100 persons and 95% CI |
|----------------------|---------------------|-------------------------------------------------|----------------------------------------|-----------|---------------|--------------------------------------------------------|
| <b>SAPT</b>          |                     |                                                 |                                        |           |               |                                                        |
| Fosbol et al 2012    | 12 months           | Bleed leading to hospitalisation                | Aspirin only                           | NR        | 223           | 10.1 (8.89, 11.4) *                                    |
| Tsai et al 2010      | 12 months           | Gastrointestinal bleed                          | Aspirin + PPI                          | NR        | 148           | 12.3 (10.6, 14.3) *                                    |
|                      |                     |                                                 | Clopidogrel only                       |           | 34            | 2.57 (1.84, 3.56) *                                    |
|                      |                     |                                                 | Clopidogrel + PPI                      |           | 91            | 8.65 (7.1, 10.5) *                                     |
| Sorensen et al 2009  | 476.5 days (Mean)   | Fatal and non-fatal bleed                       | Aspirin only                           | NR        | 709           | 3.78 (3.52, 4.06) *                                    |
|                      |                     |                                                 | Clopidogrel only                       |           | 158           | 2.18 (1.87, 2.54) *                                    |
| Wong et al 2006      | 21 months           | CURE major/life threatening                     | Aspirin                                | NR        | 7             | 6.48 (3.17, 12.8) *                                    |
| Erta et al 2018      | 24 months           | Physician-confirmed bleeding event              | SAPT                                   | NR        | 1             | 0.88 (0.16, 4.80) *                                    |
| <b>DAPT</b>          |                     |                                                 |                                        |           |               |                                                        |
| Cuisset et al 2009   | 1 month             | TIMI major/minor                                | Aspirin (75 mg) + clopidogrel (75 mg)  | 1 month   | 16            | 2.68 (1.66, 4.31) *                                    |
| Amin et al 2016      | 6 Months            | BARC 1-5                                        | Aspirin + thienopyridine               | NR        | 2246          | 24.2 (23.3, 25.1) *                                    |
| Lattuca et al 2016   | 12 Months           | BARC 1-3                                        | Aspirin + prasugrel                    | NR        | 68            | 33.3 (27.2, 40.1) *                                    |
|                      |                     |                                                 | Aspirin + clopidogrel                  |           | 64            | 38.8 (31.7, 46.4) *                                    |
| Bacquelin et al 2015 | 12 Months           | BARC 2-5                                        | Aspirin + thienopyridine               | NR        | 70            | 7.32 (5.84, 9.15) *                                    |
| Palmerini et al 2014 | 12 months           | BARC (any)                                      | Aspirin (160 mg) + clopidogrel (75 mg) | 12 months | 41            | 3.91 (2.89, 5.26) *                                    |
| Fosbol et al 2012    | 12 months           | Bleed leading to hospitalisation                | Aspirin + clopidogrel                  |           | 336           | 11.8 (10.7, 13.1) *                                    |
| Effron et al 2018    | 12 months           | Bleed leading to hospitalisation or transfusion | Aspirin + prasugrel                    | NR        | 393           | 3.07 (2.79, 3.38) *                                    |
|                      |                     |                                                 | Aspirin + ticagrelor                   |           | 99            | 3.31 (2.73, 4.01) *                                    |



|                             |                   |                                    |                                      |          |     |                     |
|-----------------------------|-------------------|------------------------------------|--------------------------------------|----------|-----|---------------------|
| <b>Carrero et al 2016</b>   | 12 months         | Major bleed                        | Aspirin + clopidogrel                | 12months | 333 | 0.92 (0.83, 1.03) * |
| <b>Sra et al 2016</b>       | 15 months         | BARC 1-5                           | Aspirin + thienopyridine             | NR       | 353 | 20.1 (18.3, 22.0) * |
| <b>Caneiro et al 2018</b>   | 15 months         | BARC 2 - 3                         | Aspirin + thienopyridine             | NR       | 428 | 11.9 (10.9, 13.0) * |
| <b>Sorensen et al 2009</b>  | 476.5 days (Mean) | Fatal and non-fatal bleed          | Aspirin + clopidogrel                | NR       | 421 | 3.45 (3.14, 3.78) * |
| <b>Cuschieri et al 2014</b> | 1.7 years (Mean)  | Gastrointestinal bleed             | Aspirin + clopidogrel                | NR       | 107 | 3.33 (2.76, 4.00) * |
| <b>Wong et al 2006</b>      | 21 months         | CURE major/life threatening        | Aspirin + clopidogrel                |          | 8   | 6.9 (3.5, 13.0) *   |
| <b>Voss et al 2016</b>      | 1.94 years (mean) | Other                              | Aspirin + clopidogrel                | NR       | 206 | 5.88 (5.15, 6.71) * |
| <b>Brener et al 2016</b>    | 24 months         | TIMI, GUSTO and AUCITY Major bleed | Aspirin + clopidogrel                | NR       | 430 | 5.17 (4.71, 5.66) * |
| <b>Erta et al 2018</b>      | 24 months         | Physician-confirmed bleeding event | DAPT                                 | NR       | 20  | 2.20 (1.43, 3.37) * |
| <b>Anticoagulant</b>        |                   |                                    |                                      |          |     |                     |
| <b>Braun et al 2014</b>     | 3 months          | BARC 2-5                           | Ticagrelor + warfarin                | 3 months | 10  | 9.43 (5.21, 16.5) * |
|                             |                   |                                    | Aspirin + clopidogrel + warfarin     |          | 16  | 10.2 (6.37, 15.9) * |
| <b>Bacquelin et al 2015</b> | 12 Months         | BARC 2-5                           | Aspirin + thienopyridine + vitamin k | NR       | 6   | 18.8 (8.89, 35.3) * |
| <b>Fosbol et al 2012</b>    | 12 months         | Bleed leading to hospitalisation   | Warfarin only                        | NR       | 78  | 13.9 (11.2, 16.9) * |
|                             |                   |                                    | Warfarin + aspirin                   |          | 182 | 14.3 (12.5, 16.4) * |
|                             |                   |                                    | Warfarin + aspirin + clopidogrel     |          | 109 | 14.9 (12.5, 17.7) * |
| <b>Sra et al 2016</b>       | 15 months         | BARC 1-5                           | Aspirin + thienopyridine + OAC       | NR       | 87  | 31.4 (26.2, 37.1) * |
| <b>Caneiro et al 2018</b>   | 15 months         | BARC 2 - 3                         | Anticoagulant                        | NR       | 101 | 21.1 (17.7, 25.0) * |
| <b>Sorensen et al 2009</b>  | 476.5 days (Mean) | Fatal and non-fatal bleed          | Vitamin k only                       | NR       | 60  | 4.55 (3.55, 5.81) * |
|                             |                   |                                    | Aspirin + vitamin k                  |          | 133 | 17.8 (15.2, 20.7) * |
|                             |                   |                                    | Clopidogrel + vitamin k              |          | 30  | 15.3 (10.9, 21.0) * |

|  |  |  |                                      |  |    |                     |
|--|--|--|--------------------------------------|--|----|---------------------|
|  |  |  | Aspirin + clopidogrel +<br>vitamin k |  | 61 | 19.4 (15.4, 24.1) * |
|--|--|--|--------------------------------------|--|----|---------------------|

\* Incidence and associated 95% CI calculated from data within study, **CI**: Confidence Interval, **SD**: Standard deviation, **SAPT**: Single antiplatelet, **DAPT**: Dual antiplatelet, **PPI**: Proton Pump Inhibitor, **OAC**: Oral Anticoagulation, **NR**; not reported, **CURE**: Clopidogrel in Unstable angina to prevent Recurrent Events, **TIMI**: Thrombolysis In Myocardial Infarction, **BARC**: Bleeding Academic Research Consortium, **GUSTO**: Global Use of Strategies To open Occluded arteries, **ACUITY**; acute catheterisation and urgent intervention triage strategy.

**Table 5:** Incidence of bleeding in randomised controlled trials stratified by discharge antithrombotic therapy and duration

| Primary Author              | Length of Follow-up | Bleeding definition | Discharge Antithrombotic combination           | Duration  | No with bleed | Crude Incidence of Bleeding per 100 persons and 95% CI |
|-----------------------------|---------------------|---------------------|------------------------------------------------|-----------|---------------|--------------------------------------------------------|
| <b>SAPT</b>                 |                     |                     |                                                |           |               |                                                        |
| <b>Yeh et al 2015</b>       | 18 months           | BARC 2-5            | Aspirin + placebo                              | 18 months | 35            | 1.98 (1.42, 2.74) *                                    |
| <b>Bonaca et al 2015</b>    | 33 months           | TIMI major          | Aspirin (75 -150 mg) + placebo                 | 33 months | 72            | 1.03 (0.82, 1.29) *                                    |
| <b>DAPT</b>                 |                     |                     |                                                |           |               |                                                        |
| <b>Carrabba et al 2016</b>  | 12 months           | BARC 1-3            | Aspirin (100 mg) + prasugrel (10 mg)           | 12 months | 45            | 47.4 (37.6, 57.3) *                                    |
|                             |                     |                     | Aspirin (100 mg) + prasugrel (5 mg)            |           | 31            | 31.6 (23.3, 41.4) *                                    |
| <b>Cuisset et al 2017</b>   | 12 months           | BARC $\geq$ 2       | Aspirin + clopidogrel                          | NR        | 30            | 9.49 (6.73, 13.2) *                                    |
|                             |                     |                     | Aspirin + prasugrel/ticagrelor                 |           | 76            | 23.9 (19.5, 28.9) *                                    |
| <b>Han et al 2015</b>       | 12 months           | BARC 1-5            | Aspirin + clopidogrel                          | NR        | 47            | 2.33 (1.76, 3.08) *                                    |
| <b>Savonitto et al 2012</b> | 12 months           | BARC 2, 3a & 3b     | Aspirin + thienopyridine                       | NR        | 3             | 0.96 (0.33, 2.78) *                                    |
| <b>Kohli et al 2014</b>     | 450 days            | TIMI major/minor    | Aspirin ( $\leq$ 150 mg) + clopidogrel (75 mg) | NR        | 103           | 2.75 (2.27, 3.32) *                                    |
|                             |                     |                     | Aspirin ( $\geq$ 150 mg) + clopidogrel (75 mg) |           | 70            | 2.80 (2.22, 3.52) *                                    |
|                             |                     |                     | Aspirin ( $\leq$ 150 mg) + prasugrel (75 mg)   |           | 137           | 3.60 (3.05, 4.24) *                                    |
|                             |                     |                     | Aspirin ( $\geq$ 150 mg) + prasugrel (75 mg)   |           | 97            | 3.82 (3.14, 4.64) *                                    |
| <b>Yeh et al 2015</b>       | 18 months           | BARC 2-5            | Aspirin + thienopyridine                       | 18 months | 76            | 4.21 (3.38, 5.24) *                                    |

|                            |           |               |                                             |           |     |                     |
|----------------------------|-----------|---------------|---------------------------------------------|-----------|-----|---------------------|
| <b>Costa et al 2015</b>    | 6 months  | BARC 2-5      | Aspirin (80 - 160 mg) + clopidogrel (75 mg) | 6 months  | 30  | 4.09 (2.88, 5.78) * |
|                            | 24 months |               | Aspirin (80 - 160 mg) + clopidogrel (75 mg) | 24 months | 52  | 7.10 (5.46, 9.20) * |
| <b>Bonaca et al 2015</b>   | 33 months | TIMI major    | Aspirin + ticagrelor (60 mg)                | 33 months | 170 | 2.44 (2.11, 2.83) * |
|                            |           |               | Aspirin + ticagrelor (90 mg)                |           | 193 | 2.76 (2.40, 3.17) * |
| <b>Nikolsky et al 2015</b> | 3 years   | HORIZON major | Aspirin + thienopyridine                    | NR        | 63  | 2.15 (1.68, 2.74) * |
| <b>Anticoagulant</b>       |           |               |                                             |           |     |                     |
| <b>Bergen et al 1994</b>   | 37 months | Major bleed   | Nicoumalone or phenprocoumon                | 37 months | 73  | 4.29 (3.43, 5.37) * |

\* Incidence and associated 95% CI calculated from data within study, **CI**: Confidence Interval, **SD**: Standard deviation, **SAPT**: Single antiplatelet, **DAPT**: Dual antiplatelet, **PPI**: Proton Pump Inhibitor, **NR**: not reported, **BARC**: Bleeding Academic Research Consortium, **TIMI**: Thrombolysis In Myocardial Infarction, **HORIZON**: Harmonising Outcomes with Revascularisation and stents.

**Table 6:** Incidence of major, minor and nuisance bleeding events in observational studies and RCTs that used any of the formal bleeding definitions stratified by length of follow-up.

| Observational Studies |                       |                          |                                                | Randomised Controlled Trials |                     |                          |                                                |
|-----------------------|-----------------------|--------------------------|------------------------------------------------|------------------------------|---------------------|--------------------------|------------------------------------------------|
| Length of follow-up   | Study ID              | Bleeding definition used | Incidence of bleeds per 100 persons and 95% CI | Length of follow-up          | Study ID            | Bleeding definition used | Incidence of bleeds per 100 persons and 95% CI |
| <b>Major bleeds</b>   |                       |                          |                                                | <b>Major bleeds</b>          |                     |                          |                                                |
| 30 days               | Cuisset et al 2009    | TIMI major               | 0.84 (0.36, 1.95)<br>*                         | 6 months                     | Yusuf et al 2006    | OASIS-5 major            | 1.84 (1.66, 2.03)<br>*                         |
| 3 months              | Braun et al 2014      | BARC 3 - 5               | 5.32 (3.20, 8.74)<br>*                         | 8 months                     | Jolly et al 2009    | CURE major               | 1.07 (0.74, 1.54)<br>*                         |
| 12 months             | Lattuca et al 2016    | BARC 3                   | 3.25 (1.87, 5.60)<br>*                         | 12 months                    | Carrabba et al 2016 | BARC 3                   | 2.07 (0.81, 5.21)<br>*                         |
|                       | Raposeiras et al 2018 | BARC 3 - 5               | 1.53 (1.21, 1.94)<br>*                         |                              | Han et al 2015      | BARC 3 - 5               | 0.10 (0.03, 0.36)<br>*                         |
|                       | Bacquelin et al 2015  | BARC 3 - 5               | 1.29 (0.76, 2.20)<br>*                         |                              | Cuisset et al 2017  | TIMI major               | 0.79 (0.34, 1.83)<br>*                         |
|                       | Yetgin et al 2018     | TIMI major               | 0.94 (0.63, 1.41)<br>*                         |                              | Mrdovic et al 2013  | TIMI major               | 0.15 (0.05, 0.45)<br>*                         |
|                       | Kassaian et al 2015   | GUSTO severe             | 0.67 (0.37, 1.20)<br>*                         |                              | 15 months           | Mahaffey et al 2013      | TIMI major                                     |
| 15 months             | Caneiro et al 2018    | BARC 3                   | 3.33 (2.83, 3.92)<br>*                         | Kohli et al 2014             |                     | TIMI major               | 1.20 (1.02, 1.40)<br>*                         |
|                       | Sra et al 2016        | BARC 3 - 5               | 1.03 (0.68, 1.57)<br>*                         | > 15 months                  | Costa et al 2015    | BARC 3 - 5               | 2.73 (2.01, 3.70)<br>*                         |
| > 15 months           | Brener et al 2016     | TIMI/GUSTO/ACUITY        | 5.17 (4.71, 5.66)<br>*                         |                              | Yeh et al 2015      | BARC 3 - 5               | 1.48 (1.13, 1.93)<br>*                         |
|                       | Wong et al 2006       | CURE major               | 3.13 (1.52, 6.31)<br>*                         |                              | Bonaca et al 2015   | TIMI major               | 1.41 (1.26, 1.58)<br>*                         |
|                       |                       |                          |                                                |                              | Nikolsky et al 2015 | Horizon major            | 2.15 (1.68, 2.74)<br>*                         |
| <b>Minor bleeds</b>   |                       |                          |                                                | <b>Minor bleeds</b>          |                     |                          |                                                |
| 30 days               | Cuisset et al 2009    | TIMI minor               | 1.84 (1.03, 3.27)<br>*                         | 12 months                    | Carrabba et al 2016 | BARC 2                   | 6.22 (3.59, 10.6)<br>*                         |

|                        |                      |            |                        |                        |             |                     |              |                        |
|------------------------|----------------------|------------|------------------------|------------------------|-------------|---------------------|--------------|------------------------|
| 3 months               | Braun et al 2014     | BARC 2     | 4.56 (2.63, 7.80)<br>* |                        |             | Han et al 2015      | BARC 2       | 0.35 (0.17, 0.71)<br>* |
| 12 months              | Lattuca et al 2016   | BARC 2     | 10.6 (7.83, 14.1)<br>* |                        |             | Cuisset et al 2017  | TIMI minor   | 5.52 (4.00, 7.58)<br>* |
|                        | Bacquelin et al 2015 | BARC 2     | 6.56 (5.19, 8.26)<br>* |                        |             | Mrdovic et al 2013  | TIMI minor   | 0.36 (0.17, 0.74)<br>* |
|                        | Kassaian et al 2015  | GUSTO mild | 0.73 (0.42, 12.7)<br>* |                        | 15 months   | Kohli et al 2014    | TIMI minor   | 2.03 (1.80, 2.29)<br>* |
| 15 months              | Caneiro et al 2018   | BARC 2     | 8.49 (7.69, 9.37)<br>* |                        |             | Mahaffey et al 2013 | TIMI minor   | 0.76 (0.61, 0.93)<br>* |
|                        | Sra et al 2016       | BARC 2     | 4.67 (3.78, 5.76)<br>* |                        |             | Costa et al 2015    | BARC 2       | 2.87 (2.13, 3.85)<br>* |
| > 15 months            | Wong et al 2006      | CURE minor | 3.57 (1.82, 6.89)<br>* |                        | > 15 months | Yeh et al 2015      | BARC 2       | 1.71 (1.33, 2.18)<br>* |
|                        |                      |            |                        |                        |             | Bonaca et al 2015   | TIMI minor   | 0.66 (0.56, 0.78)<br>* |
| <b>Nuisance bleeds</b> |                      |            |                        | <b>Nuisance bleeds</b> |             |                     |              |                        |
| 6 months               | Amin et al 2016      | BARC 1     | 9.14 (8.57, 9.74)<br>* |                        |             | Carrabba et al 2016 | BARC 1       | 31.9 (24.9, 37.9)<br>* |
| 12 months              | Amin et al 2013      | BARC 1     | 37.5 (35.9, 39.1)<br>* |                        | 12 months   | Han et al 2015      | BARC 1       | 1.88 (1.37, 2.57)<br>* |
|                        | Lattuca et al 2016   | BARC 1     | 21.9 (18.0, 26.5)<br>* |                        |             | Cuisset et al 2017  | TIMI minimal | 10.4 (8.27, 13.0)<br>* |
| 15 months              | Sra et al 2016       | BARC 1     | 19.2 (17.4, 21.1)<br>* |                        |             | Mrdovic et al 2013  | TIMI minimal | 0.77 (0.47, 1.27)<br>* |

\*Incidence and associated 95% CI calculated from data within study, **CI**: Confidence Interval, **TIMI**: Thrombolysis In Myocardial Infarction, **BARC**: Bleeding Academic Research Consortium, **GUSTO**: Global Use of Strategies To open Occluded arteries, **ACUITY**; acute catheterisation and urgent intervention triage strategy. **CURE**: Clopidogrel in Unstable angina to prevent Recurrent Events, **HORIZON**: Harmonising Outcomes with Revascularisation and stents, **OASIS-5**: the fifth Organization to Assess Strategies In acute ischemic Syndromes

**Table 7:** Incidence of different types of bleeding events stratified by length of follow-up.

| Type of bleed           | Study design                 | Length of follow-up   | Study ID             | Incidence of bleeds per 100 persons and 95% CI |
|-------------------------|------------------------------|-----------------------|----------------------|------------------------------------------------|
| <b>Bruising</b>         | <i>Observational studies</i> | <i>12 months</i>      | Bacquelin et al 2015 | 1.49 (0.91, 2.45) *                            |
|                         |                              |                       | Amin et al 2013      | 20.1 (18.8, 21.4) *                            |
|                         |                              |                       | Lattuca et al 2016   | 22.5 (18.5, 27.0) *                            |
| <b>Gastrointestinal</b> | <i>Observational studies</i> | <i>30 days</i>        | Cuisset et al 2009   | 0.50 (0.17, 1.47) *                            |
|                         |                              | <i>3 months</i>       | Braun et al 2014     | 4.56 (2.63, 7.80) *                            |
|                         |                              | <i>12 months</i>      | Yetgin et al 2018    | 0.25 (0.11, 0.53) *                            |
|                         |                              |                       | Garay et al 2016     | 1.16 (0.72, 1.88) *                            |
|                         |                              |                       | Bacquelin et al 2015 | 1.79 (1.13, 2.81) *                            |
|                         |                              | Lattuca et al 2016    | 4.88 (3.11, 7.58) *  |                                                |
|                         |                              | Tsai et al 2010       | 7.63 (6.80, 8.54) *  |                                                |
|                         |                              | <i>15 months</i>      | Sorensen et al 2009  | 1.88 (1.75, 2.02) *                            |
|                         |                              | <i>&gt; 15 months</i> | Cuschieri et al 2014 | 3.33 (2.76, 4.00) *                            |
|                         | Voss et al 2016              |                       | 3.65 (3.08, 4.33) *  |                                                |
|                         | <i>RCTs</i>                  | <i>12 months</i>      | Atar et al 2006      | 1.02 (0.84, 1.24) *                            |
|                         |                              |                       | Mrdovic et al 2013   | 0.67 (0.39, 1.14) *                            |
| Kohli et al 2014        |                              |                       | 0.66 (0.53, 0.82) *  |                                                |
| <b>Respiratory</b>      | <i>Observational studies</i> | <i>12 months</i>      | Bacquelin et al 2015 | 0.50 (0.21, 1.16) *                            |
|                         |                              |                       | Garay et al 2016     | 1.09 (0.66, 1.79) *                            |
|                         |                              | <i>15 months</i>      | Sorensen et al 2009  | 0.54 (0.47, 0.62) *                            |
|                         |                              | <i>&gt; 15 months</i> | Voss et al 2016      | 0.91 (0.65, 1.29) *                            |
|                         | <i>RCTs</i>                  | <i>12 months</i>      | Mrdovic et al 2013   | 0.51 (0.28, 0.95) *                            |
| <b>Genito-Urinary</b>   | <i>Observational studies</i> | <i>12 months</i>      | Bacquelin et al 2015 | 0.50 (0.21, 1.16) *                            |
|                         |                              |                       | Garay et al 2016     | 1.75 (1.18, 2.58) *                            |
|                         |                              |                       | Lattuca et al 2016   | 2.17 (1.10, 4.22) *                            |
|                         |                              | <i>15 months</i>      | Sorensen et al 2009  | 0.70 (0.62, 0.78) *                            |

|                     |                              |                     |                      |                     |
|---------------------|------------------------------|---------------------|----------------------|---------------------|
|                     |                              | > 15 months         | Voss et al 2016      | 0.80 (0.55, 1.15) * |
|                     | <i>RCTs</i>                  | 12 months           | Mrdovic et al 2013   | 0.15 (0.05, 0.45) * |
| <b>Intracranial</b> | <i>Observational studies</i> | 30 days             | Cuisset et al 2009   | 0.34 (0.09, 1.21) * |
|                     |                              | 3 months            | Braun et al 2014     | 0.76 (0.21, 2.73) * |
|                     |                              | 12 months           | Yetgin et al 2018    | 0.25 (0.11, 0.53) * |
|                     |                              |                     | Garay et al 2016     | 0.36 (0.16, 0.85) * |
|                     |                              |                     | Bacquelin et al 2015 | 0.40 (0.15, 10.2) * |
|                     |                              |                     | Graipe et al 2015    | 0.31 (0.29, 0.34) * |
|                     |                              |                     | Wang et al 2015      | 0.20 (0.18, 0.22) * |
|                     |                              | 15 months           | Sorensen et al 2009  | 0.46 (0.40, 0.53) * |
|                     |                              | > 15 months         | Voss et al 2016      | 0.43 (0.26, 0.70) * |
| <i>RCTs</i>         | > 15 months                  | Bonaca et al 2015   | 0.45 (0.37, 0.55) *  |                     |
| <b>Intraocular</b>  | <i>Observational studies</i> | 12 months           | Lattuca et al 2016   | 0.27 (0.05, 1.52) * |
|                     |                              | > 15 months         | Voss et al 2016      | 0.20 (0.10, 0.41) * |
| <b>Unspecified†</b> | <i>Observational studies</i> | 3 months            | Braun et al 2014     | 1.90 (0.81, 4.37) * |
|                     |                              | 12 months           | Yetgin et al 2018    | 0.25 (0.11, 0.53) * |
|                     |                              |                     | Bacquelin et al 2015 | 0.60 (0.27, 1.30) * |
|                     |                              |                     | Lattuca et al 2016   | 0.81 (0.28, 2.36) * |
| > 15 months         | Voss et al 2016              | 0.20 (0.10, 0.41) * |                      |                     |

\* Incidence and associated 95% CI calculated from data within study, †Bleeds from unspecified location, CI: Confidence, RCT: Randomised controlled trial



**Table 8:** Summary of the assessment of the strength of evidence for each secondary outcome

| <b>Outcome and length of follow-up post hospital discharge</b> | <b>Strength of Evidence</b>                                                                                                                                                                                |
|----------------------------------------------------------------|------------------------------------------------------------------------------------------------------------------------------------------------------------------------------------------------------------|
| All-cause mortality (within 1 to 3.5 years)                    | <b>SOE</b> = Low (5 observational studies and 1 RCT; 142,945 participants)<br>Low level of evidence due to moderate risk of bias, and residual confounding.                                                |
| MACE (within 476 days)                                         | <b>SOE</b> = Insufficient (1 observational study; 40812 participants)<br>Insufficient, because evidence was derived from only one study which is at high risk of bias, as such conclusion cannot be drawn. |
| Re-hospitalisation (within 12 months)                          | <b>SOE</b> = Insufficient (1 observational study; 3560 participants)<br>Insufficient, because evidence was derived from only one study which is at high risk of bias, as such conclusion cannot be drawn.  |

SOE: strength of evidence, MACE: major adverse cardiovascular event, RCT: randomised controlled trial.
